# Supplementary material for: Plant traits dominate global spatiotemporal variations in photosynthetic efficiency
Source: Research Square preprint supplement (doi:10.21203/rs.3.rs-5022995/v1), 2024-09-19
Supplement: Supplementary file 1 [file 2c37ee4531481f5fa550ab74.docx]

**Supplementary information for**

**Plant traits dominate global spatiotemporal variations in photosynthetic efficiency**

Yulin Yan1*, Bolun Li2, Benjamin Dechant3,4, Mingzhu Xu1, Xiangzhong Luo5, Sai Qu5, Guofang Miao1, Jiye Leng6, Rong Shang1, Lei Shu1, Chongya Jiang7, Han Wang8, Sujong Jeong9, Youngryel Ryu10, Jing M. Chen1,7*

1 Key Laboratory of Humid Subtropical Eco-Geographical Process (Ministry of Education), Fujian Normal University, Fuzhou, China

2 School of Geographical Sciences, Nanjing University of Information Science and Technology, Nanjing, China

3 German Centre for Integrative Biodiversity Research, Leipzig, Germany

4 Leipzig University, Leipzig, Germany

5 Department of Geography, National University of Singapore, Singapore

6 Department of Geography and Planning, University of Toronto, Toronto, Canada

7 College of Agriculture, Nanjing Agricultural University, Nanjing, China

8 Department of Earth System Science, Tsinghua University, Beijing, China

9 Department of Environmental Planning, Seoul National University, Seoul, South Korea

10 Department of Landscape Architecture and Rural Systems Engineering, Seoul National University, Seoul, South Korea

⁎ Correspondence:

Dr. Yulin Yan, Key Laboratory of Humid Subtropical Eco-Geographical Process (Ministry of Education), Fujian Normal University, Fuzhou, China ([yulin.yan@outlook.com](mailto:yulin.yan@outlook.com))

Prof. Dr. Jing M. Chen, Department of Geography and Planning, University of Toronto, Toronto, Canada ([jing.chen@utoronto.ca](mailto:jing.chen@utoronto.ca))

**Table of Contents**

[**1.1** **Empirically derived community site-mean N and P** 3](#_Toc176265999)

[**1.2** **Reliability of multisource data and its association with ecosystem PE** 4](#_Toc176266000)

[**1.3** **Performance of machine learning models and its decision-making process** 8](#_Toc176266001)

[**1.4** **Consolidating primary discoveries across PFTs** 9](#_Toc176266002)

[**1.5** **Consolidating primary discoveries with alternative datasets** 15](#_Toc176266003)

[**References** 24](#_Toc176266004)

# **Empirically derived community site-mean N and P**

The majority of leaf N is invested in chloroplasts1, with 18.2 ± 6.2% allocates to Rubisco2, the remainder in leaf structural components represented by LMA. Hence, we estimated site-mean leaf N based on the empirical relationship with LMA, Vcmax25, and Chl3,4.

where  (g/m2) is the leaf nitrogen content per unit area.

Similarly, previous works shown a general two-thirds power law between leaf N and P (NP2/3) across global biomes5,6. However, leaf N and P stoichiometries also change with PFTs and environments, such as herbaceous species usually have higher leaf N and P concentration than woody plants7. Hence, we estimated PFTs dependent (g/m2) by adopting a recent global leaf N and P stoichiometry and scaling relationships7:

where (mg/g) is the leaf nitrogen content per unit mass, and are PFTs dependent coefficients (Table S3) derived from global observed pairwise leaf N and P7.

Nevertheless, Narea and Parea are highly dependent on other plant traits, potentially leading to collinearity issues (Fig. S2d). Therefore, they are incorporated into the climatology baseline individually and considered as a preliminary exploration only (Fig. S1).





**Fig. S1** **Performance in estimating daily ecosystem-scale PE with additional contributions of plant traits,** including remote sensing (RS) traits (leaf chlorophyll content [Chl], leaf area index [LAI], clumping index [CIclump]), and eco-evolutionary optimality (EEO) traits (leaf longevity [LL], leaf mass per area [LMA], Narea [leaf nitrogen content by area], Parea [leaf phosphorus content by area], maximum carboxylation rate at 25 °C [Vcmax25]) incorporated into the baseline of climate only model (CIcloud, aridity, SWC, VPD, Ta, CO2)**.** (a) Variation explained. (b) Root mean square error. (c) Slope of the regression lines against Fluxnet2015 inferred PE. (d) Mean absolute percentage error.

# **Reliability of multisource data and its association with ecosystem PE**

To check correlation between relevant explainable variables, we conducted principle component analysis (Fig. S2) and Spearman correlation analysis. We found that the first two principle components (PCs) explain 55.6% of the variance. PC1 (35.8%) and PC2 (19.8%) were dominated by water avaliability metrics (ESI, SWC, VPD), nutrient condition (Narea, Parea, Chl content, Vcmax25), and canopy structure (LAI), as indicated by the loadings.


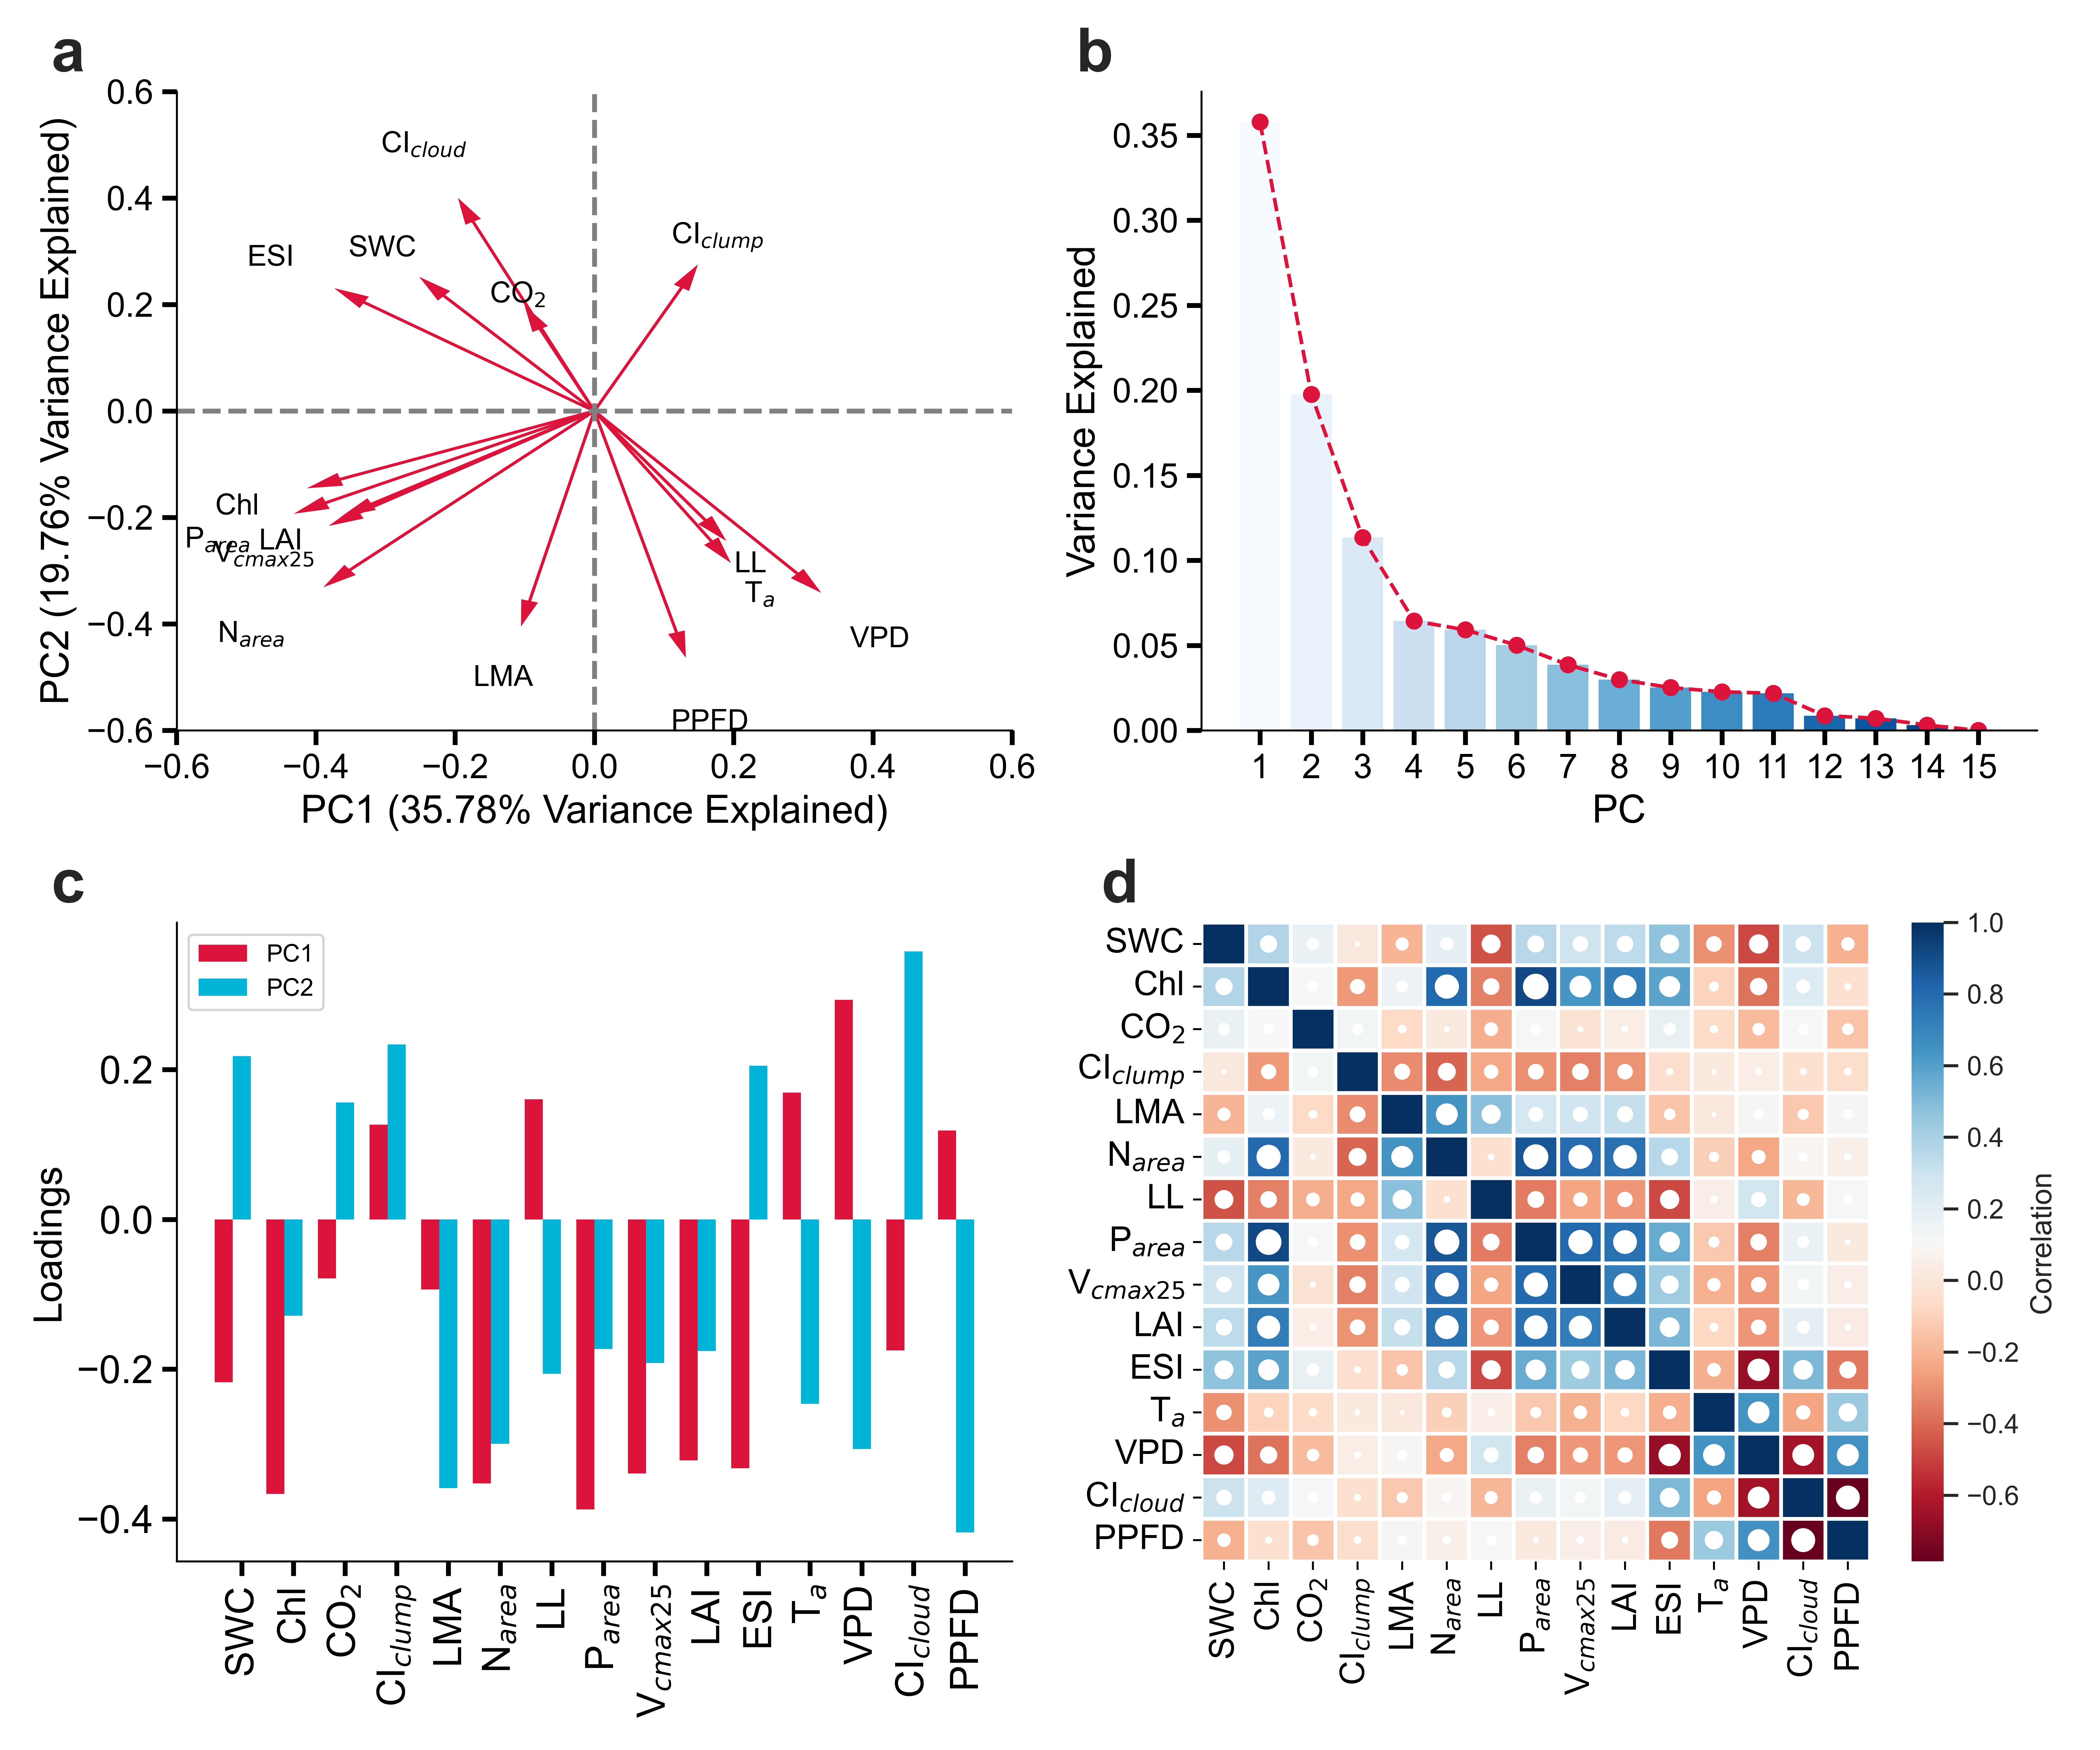
**Fig. S2** **(a-c) Principal component analysis and (d) Spearman correlation matrix**. CIcloud: cloudiness index, Chl: leaf chlorophyll content; LAI: leaf area index; LL: leaf longevity; Vcmax25: maximum carboxylation rate at 25 °C; SWC: soil water content; VPD: vapour pressure deficit; Ta: air temperature; Parea: leaf phosphorus content by area; CIclump: clumping index; Narea: leaf nitrogen content by area; LMA: leaf mass per area; ESI: ET/PET; CO2: carbon dixocide; PPFD: photosynthetic photon flux density.

Notably, we observed reasonable patterns in both the range and correlation between leaf traits and canopy structure (Fig. S3). Specifically, we found a moderate linear relationship (R2 = 0.37) and a comparable slope of 1.1 to previous findings4,8 between independently retrieved Chl content (remote sensing) and Vcmax25 (eco-evolutionary optimality). Additionally, we have observed similar notable association between other independently reterived variables, such as LAI and Chl content (R2 = 0.45), as well as LAI and leaf Narea content (R2 = 0.49). We also confirm the well-established positive LMA–LL relationship9, alongside a negative accociation between LL, Chl content, and Vcmax25. These findings indirectly substantiate the reliability of our integrated method for retrieving essential leaf traits.





**Fig. S3 Correlation among leaf traits and canopy structure**. CIcloud: cloudiness index, Chl: leaf chlorophyll content; LAI: leaf area index; LL: leaf longevity; Vcmax25: maximum carboxylation rate at 25 °C; SWC: soil water content; VPD: vapour pressure deficit; Ta: air temperature; Parea: leaf phosphorus content by area; CIclump: clumping index; Narea: leaf nitrogen content by area; LMA: leaf mass per area; Aridity: ET/PET; CO2: carbon dixocide; PPFD: photosynthetic photon flux density.



 **Fig. S4 Dependence of daily growing-season ecosystem-scale photosynthetic efficiency (PE) on leaf traits, canopy structure, and climate**. Shaded area indicates Gaussian kernel density estimation. CIcloud: cloudiness index, Chl: leaf chlorophyll; LAI: leaf area index; LL: leaf longevity; Vcmax25: maximum carboxylation rate of Rubisco at 25 °C; SWC: soil water content; VPD: vapour pressure deficit; Ta: air temperature; Parea: leaf phosphorus content by area; CIclump: clumping index; Narea: leaf nitrogen content by area; LMA: leaf mass per area; ESI: ET/PET; CO2: carbon dioxide; PPFD: photosynthetic photon flux density.

To intuitively delineate the dependence of ecosystem PE on leaf traits, canopy structure, and climate, we employed unary regression analysis and probability density estimation (Fig. S4). Despite the inherent noise in daily-scale data and potential confounding factors, clear positive associations emerged between PE and variables such as CIcloud, Chl content, LAI, Vcmax25, SWC, Parea, Narea, and the evaporative stress index (ESI; ET/PET). In contrast, LL, VPD, Ta, and PPFD exerted negative effects on PE. The influence of CIclump, LMA, and atmospheric CO2 concentration on PE was less pronounced. Importantly, the CO2 fertilization effect appears muted, likely due to the relatively short observation period of the FLUXNET2015 dataset (2000-2014) and its alignment with the leaf trait data in this study.

# **Performance of machine learning models and its decision-making process**

To identify the best-performing machine learning model, we evaluated and compared three candidate models (Fig. S5). The XGBoost model explained 80% of the seasonal dynamics in ecosystem PE, outperforming the DNN and LightGBM models overall (Fig. S5a, b, c), thus selected for subsequent analyses. To interpret the models in a human-understandable manner, we ranked feature contribution (SHAP value) alongside feature values in descending order (Fig. S5d, e, f). SHAP values attribute both the direction and magnitude of each feature to the model's prediction. A positive SHAP value for a particular instance signifies a positive influence on the prediction, whereas negative values denote a diminishing effect. Specifically, all models identified higher CIcloud, Chl content, and ESI yielded positive SHAP values, benefiting ecosystem PE, whereas higher LMA had negative effects. Notably, CIcloud, Chl content, and Vcmax25 were consistently identified as dominant features by all models. Desptite the importance of LAI, LL, Vcmax25, their feature values do not consistently correlate with the corresponding SHAP values. For instance, a short LL could result in either positive or negative SHAP values, indicating pronounced nonlinearity and potential interaction effects. The impacts of Ta, SWC, and VPD on ecosystem PE are well expected. Furthermore, we discovered that the contributions of CIclump, and CO2 are mostly marginal.

Moreover, to illustrate the decision-making process of black-box models, we selected instacnes at four percentiles (1%, 35%, 65%, 99%) of model predictions (Fig. S5g, h, i). As we ascend from the bottom of the plot, SHAP values for each feature accumulate onto the model's baseline, culminating in the model’s final decision at the top of the plot. For instance (Fig. S5h), the XGBoost model predicted a PE at the 99th quantile proximal to 0.06 (mol C/mol photons) under favarable climate conditions (e.g., 0.8 CIcloud and 0.8 ESI), sufficient nutrient supply (e.g., 71 μg cm-2 Chl and 81 μmol m-2 s-1 Vcmax25), and during an early phase of vegetation development (1.8 LAI), although low temperature (10 °C). This framework facilitates a lucid and transparent model decision-making process, elucidating the distinct contributions of each variable towards the ultimate prediction.

# **Consolidating** **primary discoveries across PFTs**

To consolidate the underlying mechanisms (Fig. 4) on a per-PFTs basis, we further delineate the main effects in detail for DBF, ENF, and GRA (Figs. S6 ̶ 8). The selection of these specific PFTs is based on their distinct characteristics and relatively sufficient validation data (*n* = 2,483–3,165). Comparing to the general model (Fig. 4), the contribution of dominant drivers (e.g., CIcloud and Chl content) are consistent in all the three PFTs (Figs. S6 ̶ 8). Similarly, elevated levels of Vcamx25 observed in both GRA and ENF ecosystems appear to result in negative SHAP values (e.g., Fig. S7c), which are comparable to the mixed results in the general model (Fig. 4e). Our investigation has revealed that these counterintuitive outcomes likely stem from instances of low-temperature stress (Fig. S9b, e, f), drought stress (Fig. S9f, & i), or the concurrent occurrence of multiple abiotic stressors (Fig. S9d, e, f). These per-PFTs results consolidate the necessity of adopting a holistic perspective (plant traits & climate) to achieve a comprehensive understanding of shifts in ecosystem functional properties. However, the nonlinear contributions of Vcmax25 are further complicated by uncertainties in remotely sensed products (see section 1.5).





**Fig. S5 (a, b, c)** **Overall performance of the three machine learning models on daily ecosystem PE estimation**, shaded area indicates Gaussian kernel density estimation. (d, e, f) Contributions (SHAP value) of each feature, the importance of feature is ranked in a descending order. (g, h, i) SHAP decision plot where the straight vertical line marks the model’s base value, and colored texts denote corresponding features’ value at four percentiles (1%, 35%, 65%, 99%) of model predictions. ESI: evaporative stress index; Chl: leaf chlorophyll content; CIcloud: cloudiness index; CIclump: clumping index; CO2: carbon dioxide; LAI: leaf area index; LL: leaf longevity; LMA: leaf mass per area; SWC: soil water content; Ta: air temperature; Vcmax25: maximum carboxylation rate at 25 °C; VPD: vapor pressure deficit.





**Fig. S6** **Contributions of leaf traits, canopy structure, and climate factors to daily ecosystem-scale PE for DBF ecosystem.** Blue represents climate variables, green denotes biochemical plant traits, and purple indicates structural plant traits. Positive SHAP values signify a positive influence on PE, while negative values indicate a diminishing effect. The color-shaded areas reflect Gaussian kernel density estimation. White dashed lines represent the nonparametric LOWESS trend, which smooths the data to reveal underlying patterns without assuming a specific functional form. ESI: evaporative stress index; Chl: leaf chlorophyll content; CIcloud: cloudiness index; CIclump: clumping index; CO2: carbon dioxide; LAI: leaf area index; LL: leaf longevity; LMA: leaf mass per area; SWC: soil water content; Ta: air temperature; Vcmax25: maximum carboxylation rate at 25 °C; VPD: vapor pressure deficit.





**Fig. S7** **Contributions of leaf traits, canopy structure, and climate factors to daily ecosystem-scale PE for ENF ecosystem.** Blue represents climate variables, green denotes biochemical plant traits, and purple indicates structural plant traits. Positive SHAP values signify a positive influence on PE, while negative values indicate a diminishing effect. The color-shaded areas reflect Gaussian kernel density estimation. White dashed lines represent the nonparametric LOWESS trend, which smooths the data to reveal underlying patterns without assuming a specific functional form. ESI: evaporative stress index; Chl: leaf chlorophyll content; CIcloud: cloudiness index; CIclump: clumping index; CO2: carbon dioxide; LAI: leaf area index; LL: leaf longevity; LMA: leaf mass per area; SWC: soil water content; Ta: air temperature; Vcmax25: maximum carboxylation rate at 25 °C; VPD: vapor pressure deficit.





**Fig. S8** **Contributions of leaf traits, canopy structure, and climate factors to daily ecosystem-scale PE for GRA ecosystem.** Blue represents climate variables, green denotes biochemical plant traits, and purple indicates structural plant traits. Positive SHAP values signify a positive influence on PE, while negative values indicate a diminishing effect. The color-shaded areas reflect Gaussian kernel density estimation. White dashed lines represent the nonparametric LOWESS trend, which smooths the data to reveal underlying patterns without assuming a specific functional form. ESI: evaporative stress index; Chl: leaf chlorophyll content; CIcloud: cloudiness index; CIclump: clumping index; CO2: carbon dioxide; LAI: leaf area index; LL: leaf longevity; LMA: leaf mass per area; SWC: soil water content; Ta: air temperature; Vcmax25: maximum carboxylation rate at 25 °C; VPD: vapor pressure deficit.





**Fig. S9** **Partial dependence of Vcamx25’s contribution on ESI, temperature, and SWC** in GRA (a-d) and ENF (e-h) ecosystems, respectively. ESI: evaporative stress index; SWC: soil water content; Ta: air temperature; Vcmax25: maximum carboxylation rate at 25 °C.

# **Consolidating primary discoveries with alternative datasets**

To further confirm the validity of our key findings, particularly the dominant role of plant traits in contributing to PE (Fig. 1-4), we employed a controlled variable approach, substituting with one alternative dataset at a time including: MERIS leaf Chl content (Fig. S10), GLASS LAI (Fig. S11), and GEOV3 fPAR (Fig. S12) data, into the XGBoost model based on the general model. We found that the XGBoost model trained with MERIS Chl data achieves slightly better accuracy (Extended Data Fig. 4) but is comparable to the general model (Fig. 1c). Chl content remains the second most influential factor, with other feature importance being nearly identical (Extended Data Fig. 4). Although we did not observe a saturation effect, the consistent negative interaction between high Chl content and LAI persists. It is noteworthy that the MERIS Chl data had a shorter temporal coverage, particularly with fewer samples for certain scenarios, e.g., for Chl ranges exceeding ~50 μg/cm2. Similarly, we observed relatively consistent findings regarding the underlying mechanisms governing PE and model performance yield from the GLASS LAI product (Fig. S11) and GEOV3 fPAR data (Fig. S12), in comparison to the general model (Fig. 4).

Furthermore, an early growing season (with a temperature above 5°C) produces comparable results (R2 = 0.79, RMSE = 32%) in terms of both feature importance (Fig. S13a) when compared to the general model. Key features such as CIcloud, Chl content, and LL retain their significance. The importance of Chl content and LL remains consistent when tested on various timescales (7-day and 14-day) (Fig. S13e, f).

**

****Fig. S10** **Contributions of leaf traits, canopy structure, and climate factors to daily ecosystem-scale PE for C3 vegetation by replacing MODIS Chl product with MERIS Chl data.** Blue represents climate variables, green denotes biochemical plant traits, and purple indicates structural plant traits. Positive SHAP values signify a positive influence on PE, while negative values indicate a diminishing effect. The color-shaded areas reflect Gaussian kernel density estimation. White dashed lines represent the nonparametric LOWESS trend, which smooths the data to reveal underlying patterns without assuming a specific functional form. ESI: evaporative stress index; Chl: leaf chlorophyll content; CIcloud: cloudiness index; CIclump: clumping index; CO2: carbon dioxide; LAI: leaf area index; LL: leaf longevity; LMA: leaf mass per area; SWC: soil water content; Ta: air temperature; Vcmax25: maximum carboxylation rate at 25 °C; VPD: vapor pressure deficit.





**Fig. S11** **Contributions of leaf traits, canopy structure, and climate factors to daily ecosystem-scale PE for C3 vegetation by replacing MODIS LAI product with GLASS LAI data.** Blue represents climate variables, green denotes biochemical plant traits, and purple indicates structural plant traits. Positive SHAP values signify a positive influence on PE, while negative values indicate a diminishing effect. The color-shaded areas reflect Gaussian kernel density estimation. White dashed lines represent the nonparametric LOWESS trend, which smooths the data to reveal underlying patterns without assuming a specific functional form. ESI: evaporative stress index; Chl: leaf chlorophyll content; CIcloud: cloudiness index; CIclump: clumping index; CO2: carbon dioxide; LAI: leaf area index; LL: leaf longevity; LMA: leaf mass per area; SWC: soil water content; Ta: air temperature; Vcmax25: maximum carboxylation rate at 25 °C; VPD: vapor pressure deficit.





**Fig. S12** **Contributions of leaf traits, canopy structure, and climate factors to daily ecosystem-scale PE for C3 vegetation by replacing MODIS fPAR product with GEOV2 fPAR data.** Blue represents climate variables, green denotes biochemical plant traits, and purple indicates structural plant traits. Positive SHAP values signify a positive influence on PE, while negative values indicate a diminishing effect. The color-shaded areas reflect Gaussian kernel density estimation. White dashed lines represent the nonparametric LOWESS trend, which smooths the data to reveal underlying patterns without assuming a specific functional form. ESI: evaporative stress index; Chl: leaf chlorophyll content; CIcloud: cloudiness index; CIclump: clumping index; CO2: carbon dioxide; LAI: leaf area index; LL: leaf longevity; LMA: leaf mass per area; SWC: soil water content; Ta: air temperature; Vcmax25: maximum carboxylation rate at 25 °C; VPD: vapor pressure deficit.


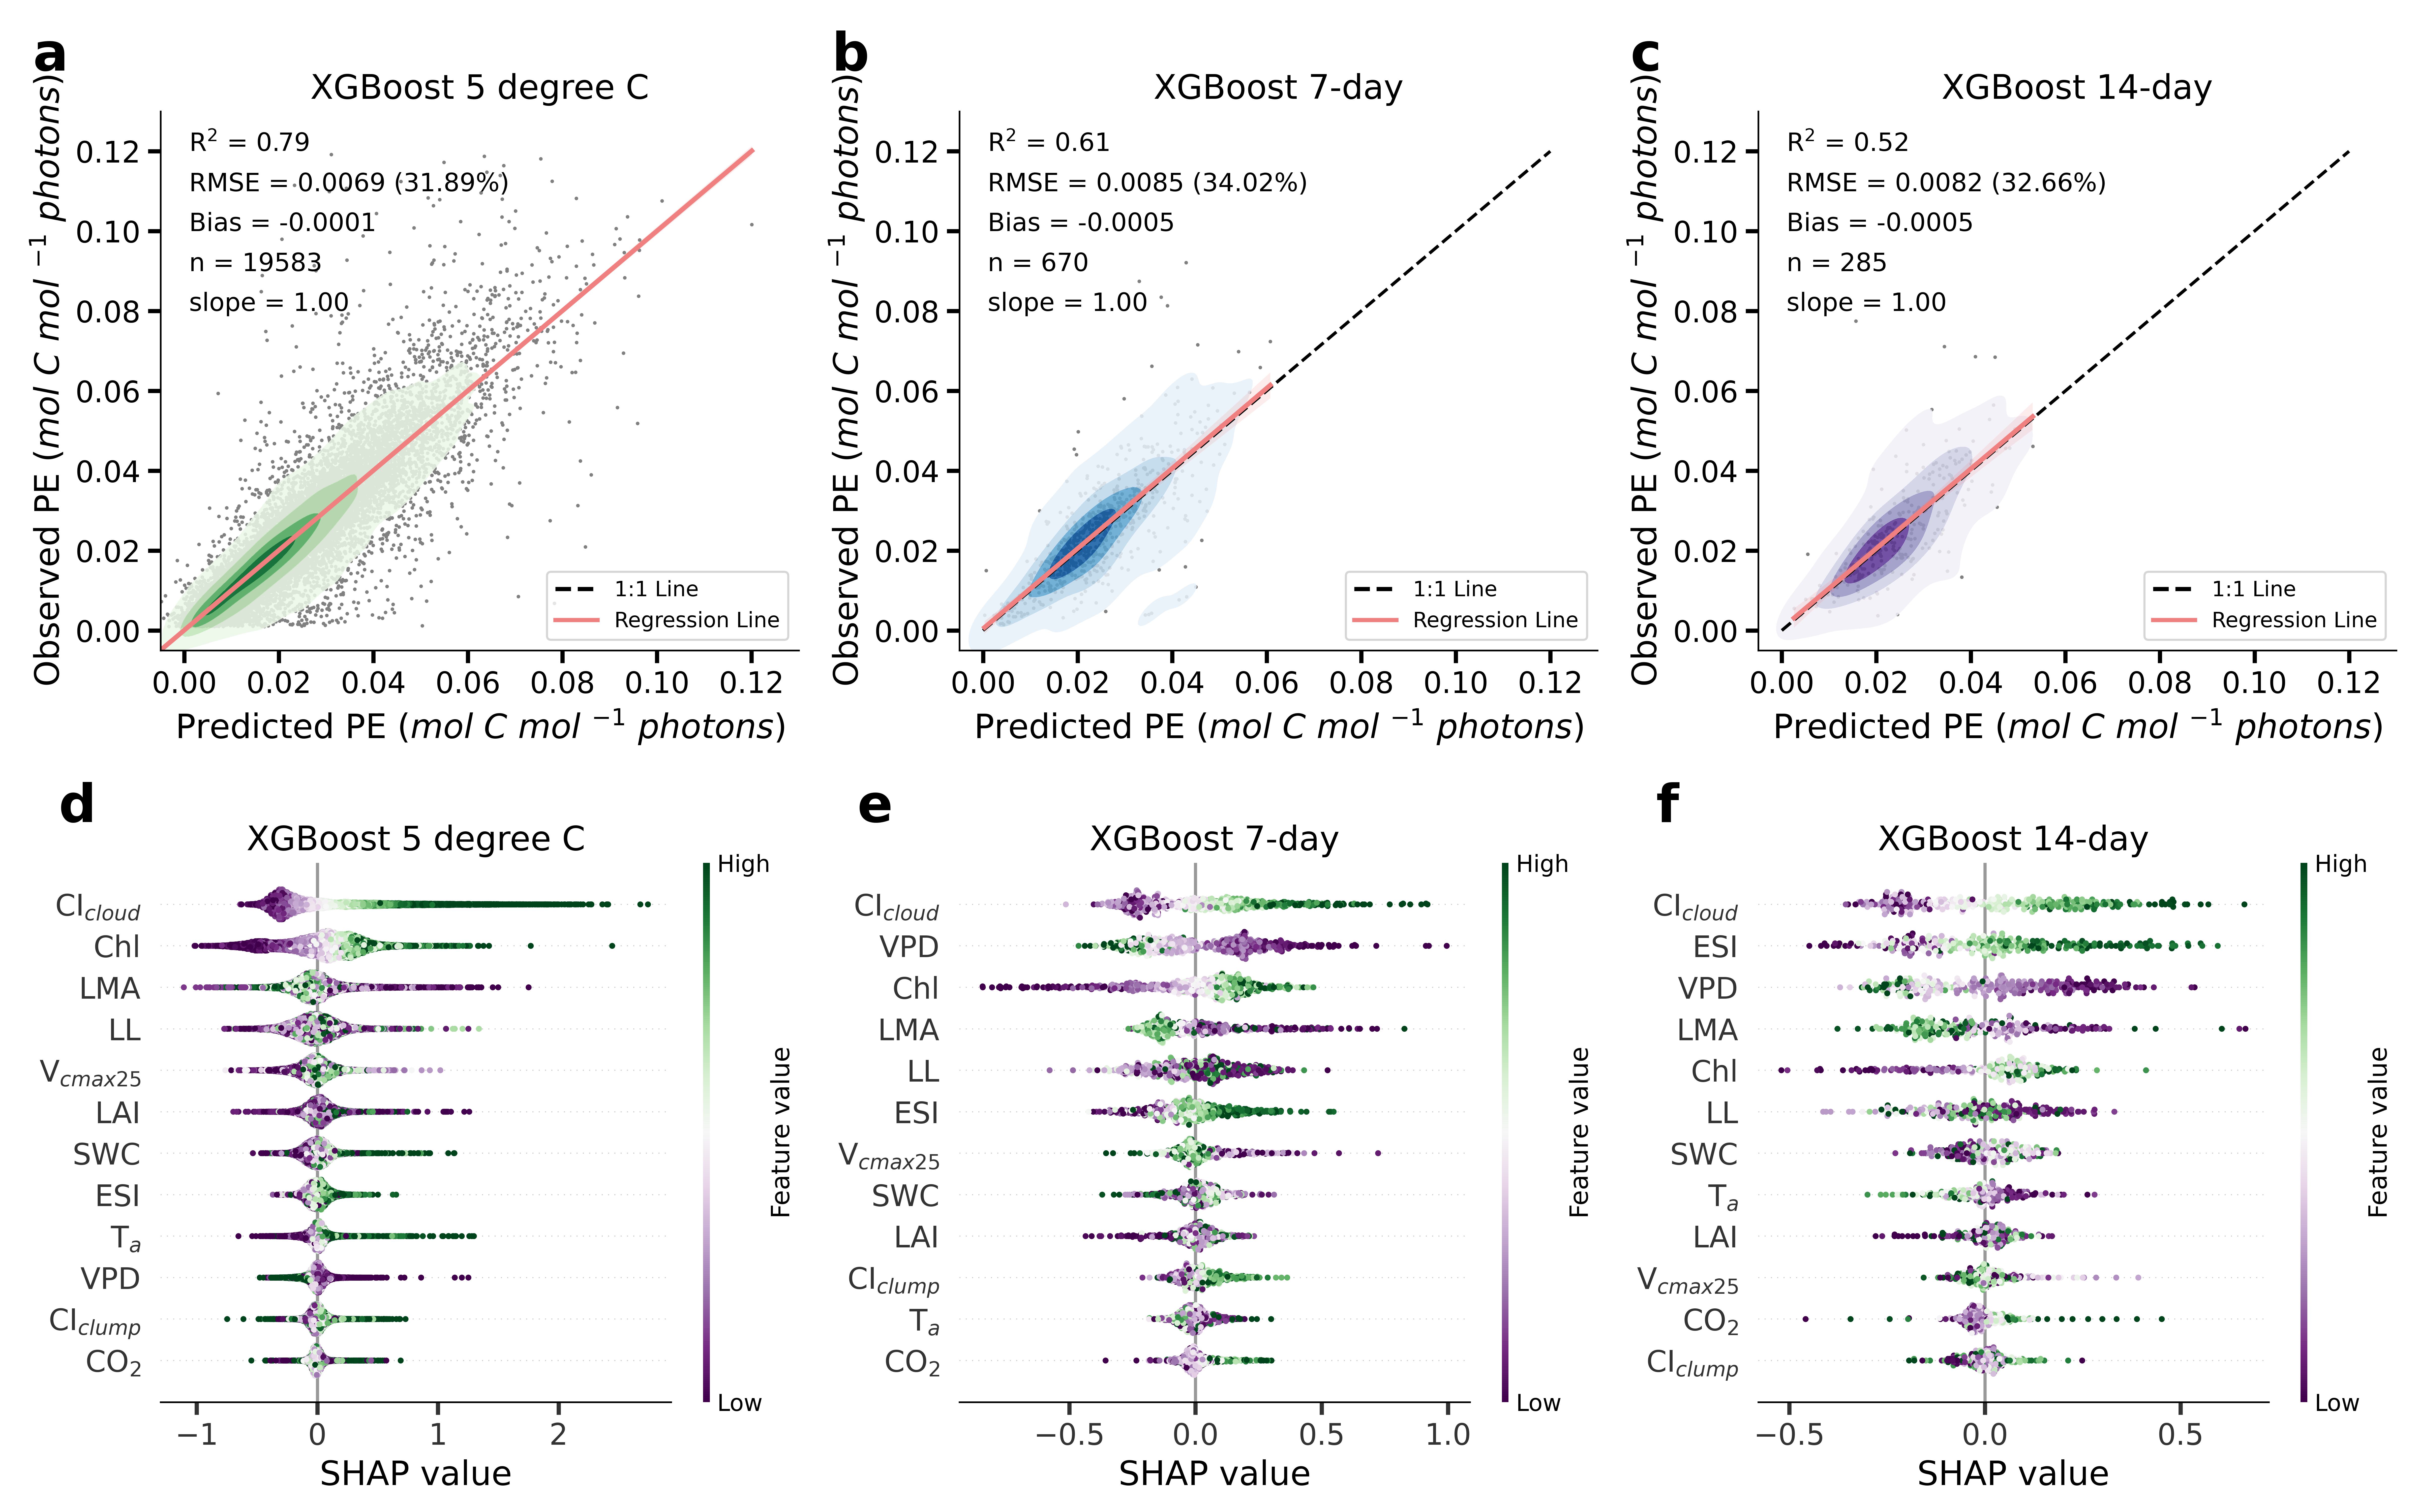


**Fig. S13** Performance of the XGBoost in different scenarios. ESI: evaporative stress index; Chl: leaf chlorophyll content; CIcloud: cloudiness index; CIclump: clumping index; CO2: carbon dioxide; LAI: leaf area index; LL: leaf longevity; LMA: leaf mass per area; SWC: soil water content; Ta: air temperature; Vcmax25: maximum carboxylation rate at 25 °C; VPD: vapor pressure deficit.

**Table S1 List of FLUXNET2015 sites used in the study**. IGBP class (Plant functional type), Köppen-Geiger climate class (Climate), coordinates (Latitude and Longitude), and C4 dominance (fraction > 50%) are reported.

| Site name | PFT | Climate | Latitude | Longitude | C4 dominance | Reference |
| --- | --- | --- | --- | --- | --- | --- |
| AT-Neu | GRA | Continental | 47.11667 | 11.3175 |  | 10 |
| AU-Ade | WSA | Tropical | -13.0769 | 131.1178 | C4 | 11 |
| AU-ASM | SAV | Dry | -22.283 | 133.249 | C4 | 12 |
| AU-Cpr | SAV | Dry | -34.0021 | 140.5891 |  | 13 |
| AU-DaP | GRA | Tropical | -14.0633 | 131.3181 | C4 | 14 |
| AU-DaS | SAV | Tropical | -14.1593 | 131.3881 | C4 | 15 |
| AU-Dry | SAV | Tropical | -15.2588 | 132.3706 | C4 | 16 |
| AU-Emr | GRA | Dry | -23.8587 | 148.4746 | C4 | 17 |
| AU-Gin | WSA | Temperate | -31.3764 | 115.7138 |  | 18 |
| AU-GWW | SAV | Dry | -30.1913 | 120.6541 |  | 19 |
| AU-How | WSA | Tropical | -12.4943 | 131.1523 | C4 | 20 |
| AU-Lox | DBF | Dry | -34.4704 | 140.6551 |  | 21 |
| AU-RDF | WSA | Tropical | -14.5636 | 132.4776 | C4 | 22 |
| AU-Rig | GRA | Temperate | -36.6499 | 145.5759 |  | 23 |
| AU-Rob | EBF | Tropical | -17.1175 | 145.6301 |  | 24 |
| AU-Stp | GRA | Dry | -17.1507 | 133.3502 | C4 | 25 |
| AU-TTE | GRA | Dry | -22.287 | 133.64 | C4 | 26 |
| AU-Tum | EBF | Temperate | -35.6566 | 148.1517 |  | 27 |
| AU-Wac | EBF | Temperate | -37.4259 | 145.1878 |  | 28 |
| AU-Whr | EBF | Temperate | -36.6732 | 145.0294 |  | 29 |
| AU-Wom | EBF | Temperate | -37.4222 | 144.0944 |  | 30 |
| AU-Ync | GRA | Dry | -34.9893 | 146.2907 |  | 31 |
| BE-Lon | CRO | Temperate | 50.55162 | 4.74623 |  | 32 |
| BE-Vie | MF | Temperate | 50.30493 | 5.99812 |  | 33 |
| CA-Gro | MF | Continental | 48.2167 | -82.1556 |  | 34 |
| CA-NS1 | ENF | Continental | 55.87917 | -98.4839 |  | 35 |
| CA-NS2 | ENF | Continental | 55.90583 | -98.5247 |  | 36 |
| CA-NS3 | ENF | Continental | 55.91167 | -98.3822 |  | 37 |
| CA-NS4 | ENF | Continental | 55.91437 | -98.3806 |  | 38 |
| CA-NS5 | ENF | Continental | 55.86306 | -98.485 |  | 39 |
| CA-NS6 | OSH | Continental | 55.91667 | -98.9644 |  | 40 |
| CA-NS7 | OSH | Continental | 56.63583 | -99.9483 |  | 41 |
| CA-Oas | DBF | Continental | 53.62889 | -106.198 |  | 42 |
| CA-Qfo | ENF | Continental | 49.6925 | -74.3421 |  | 43 |
| CA-SF1 | ENF | Continental | 54.48503 | -105.818 |  | 44 |
| CA-SF2 | ENF | Continental | 54.25392 | -105.878 |  | 45 |
| CA-SF3 | OSH | Continental | 54.09156 | -106.005 |  | 46 |
| CA-TP1 | ENF | Continental | 42.66094 | -80.5595 |  | 47 |
| CA-TP2 | ENF | Continental | 42.77442 | -80.4588 |  | 48 |
| CA-TPD | DBF | Continental | 42.63533 | -80.5577 |  | 49 |
| CH-Cha | GRA | Continental | 47.21022 | 8.41044 |  | 50 |
| CH-Dav | ENF | Polar | 46.81533 | 9.85591 |  | 51 |
| CH-Fru | GRA | Polar | 47.11583 | 8.53778 |  | 52 |
| CH-Lae | MF | Continental | 47.47833 | 8.36439 |  | 53 |
| CH-Oe1 | GRA | Continental | 47.28583 | 7.73194 |  | 54 |
| CH-Oe2 | CRO | Continental | 47.28642 | 7.73375 |  | 55 |
| CN-Cng | GRA | Continental | 44.5934 | 123.5092 | C4 | 56 |
| CN-Du2 | GRA | Continental | 42.0467 | 116.2836 |  | 57 |
| CN-Du3 | GRA | Continental | 42.0551 | 116.2809 |  | 58 |
| CZ-BK2 | GRA | Continental | 49.49443 | 18.54285 |  | 59 |
| DE-Geb | CRO | Continental | 51.09973 | 10.91463 |  | 60 |
| DE-Gri | GRA | Continental | 50.95004 | 13.51259 |  | 61 |
| DE-Hai | DBF | Continental | 51.07921 | 10.45217 |  | 62 |
| DE-Kli | CRO | Continental | 50.89306 | 13.52238 |  | 63 |
| DE-Lkb | ENF | Continental | 49.09962 | 13.30467 |  | 64 |
| DE-Lnf | DBF | Continental | 51.32822 | 10.3678 |  | 65 |
| DE-Obe | ENF | Continental | 50.78666 | 13.72129 |  | 66 |
| DE-Seh | CRO | Temperate | 50.87062 | 6.44965 |  | 67 |
| DE-Tha | ENF | Continental | 50.96256 | 13.56515 |  | 68 |
| DK-Eng | GRA | Continental | 55.69053 | 12.19175 |  | 69 |
| DK-Fou | CRO | Continental | 56.4842 | 9.58722 |  | 70 |
| DK-Sor | DBF | Temperate | 55.48587 | 11.64464 |  | 71 |
| ES-Amo | OSH | Dry | 36.83361 | -2.25232 |  | 72 |
| ES-LgS | OSH | Dry | 37.09794 | -2.96583 |  | 73 |
| ES-LJu | OSH | Dry | 36.92659 | -2.75212 |  | 74 |
| FI-Hyy | ENF | Continental | 61.84741 | 24.29477 |  | 75 |
| FR-Gri | CRO | Temperate | 48.84422 | 1.95191 |  | 76 |
| FR-LBr | ENF | Temperate | 44.71711 | -0.7693 |  | 77 |
| IT-BCi | CRO | Temperate | 40.52375 | 14.95744 |  | 78 |
| IT-CA1 | DBF | Temperate | 42.38041 | 12.02656 |  | 79 |
| IT-CA2 | CRO | Temperate | 42.37722 | 12.02604 |  | 80 |
| IT-CA3 | DBF | Temperate | 42.38 | 12.0222 |  | 81 |
| IT-Col | DBF | Temperate | 41.84936 | 13.58814 |  | 82 |
| IT-Cpz | EBF | Temperate | 41.70525 | 12.37611 |  | 83 |
| IT-Isp | DBF | Continental | 45.81264 | 8.63358 |  | 84 |
| IT-Lav | ENF | Temperate | 45.9562 | 11.28132 |  | 85 |
| IT-MBo | GRA | Continental | 46.01468 | 11.04583 |  | 86 |
| IT-Noe | CSH | Temperate | 40.60618 | 8.15169 |  | 87 |
| IT-PT1 | DBF | Temperate | 45.20087 | 9.06104 |  | 88 |
| IT-Ren | ENF | Continental | 46.58686 | 11.43369 |  | 89 |
| IT-Ro2 | DBF | Temperate | 42.39026 | 11.92093 |  | 90 |
| IT-Tor | GRA | Continental | 45.84444 | 7.57806 |  | 91 |
| JP-SMF | MF | Temperate | 35.2617 | 137.0788 |  | 92 |
| NL-Loo | ENF | Temperate | 52.16658 | 5.74356 |  | 93 |
| RU-Fyo | ENF | Continental | 56.46153 | 32.92208 |  | 94 |
| RU-Ha1 | GRA | Dry | 54.72517 | 90.00215 |  | 95 |
| SD-Dem | SAV | Dry | 13.2829 | 30.4783 | C4 | 96 |
| US-AR1 | GRA | Temperate | 36.4267 | -99.42 |  | 97 |
| US-AR2 | GRA | Temperate | 36.6358 | -99.5975 |  | 98 |
| US-ARb | GRA | Temperate | 35.5497 | -98.0402 |  | 99 |
| US-ARc | GRA | Temperate | 35.54649 | -98.04 |  | 100 |
| US-ARM | CRO | Temperate | 36.6058 | -97.4888 |  | 101 |
| US-Blo | ENF | Temperate | 38.8953 | -120.633 |  | 102 |
| US-CRT | CRO | Continental | 41.6285 | -83.3471 |  | 103 |
| US-GLE | ENF | Continental | 41.36653 | -106.24 |  | 104 |
| US-IB2 | GRA | Continental | 41.84062 | -88.241 |  | 105 |
| US-KS1 | ENF | Temperate | 28.4583 | -80.6709 |  | 106 |
| US-KS2 | CSH | Temperate | 28.6086 | -80.6715 | C4 | 107 |
| US-Lin | CRO | Dry | 36.3566 | -119.842 |  | 108 |
| US-Me1 | ENF | Temperate | 44.5794 | -121.5 |  | 109 |
| US-Me2 | ENF | Temperate | 44.4523 | -121.557 |  | 110 |
| US-Me3 | ENF | Temperate | 44.3154 | -121.608 |  | 111 |
| US-Me5 | ENF | Temperate | 44.43719 | -121.567 |  | 112 |
| US-MMS | DBF | Continental | 39.3232 | -86.4131 |  | 113 |
| US-NR1 | ENF | Continental | 40.0329 | -105.546 |  | 114 |
| US-Oho | DBF | Continental | 41.5545 | -83.8438 |  | 115 |
| US-PFa | MF | Continental | 45.9459 | -90.2723 |  | 116 |
| US-SRC | MF | Dry | 31.9083 | -110.84 |  | 117 |
| US-SRG | GRA | Dry | 31.78938 | -110.828 |  | 118 |
| US-SRM | WSA | Dry | 31.8214 | -110.866 |  | 119 |
| US-Sta | OSH | Continental | 41.3966 | -106.802 |  | 120 |
| US-Syv | MF | Continental | 46.242 | -89.3477 |  | 121 |
| US-Ton | WSA | Temperate | 38.4316 | -120.966 |  | 122 |
| US-Tw2 | CRO | Temperate | 38.1047 | -121.643 |  | 123 |
| US-Tw3 | CRO | Temperate | 38.1159 | -121.647 |  | 124 |
| US-Var | GRA | Temperate | 38.4133 | -120.951 |  | 125 |
| US-WCr | DBF | Continental | 45.8059 | -90.0799 |  | 126 |
| US-Whs | OSH | Dry | 31.7438 | -110.052 | C4 | 127 |
| US-Wkg | GRA | Dry | 31.7365 | -109.942 |  | 128 |
| ZM-Mon | DBF | Tropical | -15.4391 | 23.2525 | C4 | 129 |

Table S2. Empirical coefficients used for computing LMA.

|  |  |  |  |  |
| --- | --- | --- | --- | --- |
| Value | -0.27 | -0.96 | 3.78 | 3.55 |

Table S3. The variance inflation factor (VIF) analysis.

| Variable | VIF |
| --- | --- |
| SWC | 1.5 |
| Chl | 2.5 |
| CO2 | 1.1 |
| CIclump | 1.3 |
| LMA | 1.7 |
| LL | 1.9 |
| Vcmax25 | 2.3 |
| LAI | 2.3 |
| ESI | 3.6 |
| Ta | 2.6 |
| VPD | 5.1 |
| CIcloud | 1.5 |

ESI: evaporative stress index; Chl: leaf chlorophyll content; CIcloud: cloudiness index; CIclump: clumping index; CO2: carbon dioxide; LAI: leaf area index; LL: leaf longevity; LMA: leaf mass per area; SWC: soil water content; Ta: air temperature; Vcmax25: maximum carboxylation rate at 25 °C; VPD: vapor pressure deficit.

**References:**

1 Hikosaka, K. Interspecific difference in the photosynthesis–nitrogen relationship: patterns, physiological causes, and ecological importance. *Journal of Plant Research* **117**, 481-494 (2004). <https://doi.org:10.1007/s10265-004-0174-2>

2 Luo, X. *et al.* Global variation in the fraction of leaf nitrogen allocated to photosynthesis. *Nature Communications* **12**, 4866 (2021). <https://doi.org:10.1038/s41467-021-25163-9>

3 Dong, N., Dechant, B., Wang, H., Wright, I. J. & Prentice, I. C. Global leaf-trait mapping based on optimality theory. *Global Ecology and Biogeography* **32**, 1152-1162 (2023). <https://doi.org:https://doi.org/10.1111/geb.13680>

4 Croft, H. *et al.* Leaf chlorophyll content as a proxy for leaf photosynthetic capacity. *Global Change Biology* **23**, 3513-3524 (2017). <https://doi.org:https://doi.org/10.1111/gcb.13599>

5 Reich, P. B. *et al.* Evidence of a general 2/3-power law of scaling leaf nitrogen to phosphorus among major plant groups and biomes. *Proceedings of the Royal Society B: Biological Sciences* **277**, 877-883 (2009). <https://doi.org:10.1098/rspb.2009.1818>

6 Lai, Y. *et al.* Global change progressively increases foliar nitrogen–phosphorus ratios in China's subtropical forests. *Global Change Biology* **30**, e17201 (2024). <https://doi.org:https://doi.org/10.1111/gcb.17201>

7 Tian, D. *et al.* Global leaf nitrogen and phosphorus stoichiometry and their scaling exponent. *National Science Review* **5**, 728-739 (2018). <https://doi.org:10.1093/nsr/nwx142>

8 Qian, X., Liu, L., Croft, H. & Chen, J. Relationship Between Leaf Maximum Carboxylation Rate and Chlorophyll Content Preserved Across 13 Species. *Journal of Geophysical Research: Biogeosciences* **126**, e2020JG006076 (2021). <https://doi.org:https://doi.org/10.1029/2020JG006076>

9 Osnas, J. L. D., Lichstein, J. W., Reich, P. B. & Pacala, S. W. Global Leaf Trait Relationships: Mass, Area, and the Leaf Economics Spectrum. *Science* **340**, 741-744 (2013). <https://doi.org:10.1126/science.1231574>

10 Wohlfahrt, G., Hammerle, A. & Hörtnagl, L. FLUXNET2015 AT-Neu Neustift. (FluxNet; University of Innsbruck, 2016).

11 Beringer, J. & Hutley, L. FLUXNET2015 AU-Ade Adelaide River. (FluxNet; Monash Univ., Melbourne, VIC (Australia); Charles Darwin University, 2016).

12 Cleverly, J., Eamus, D. & Isaac, P. FLUXNET2015 AU-ASM Alice Springs. (FluxNet; University of Technology Sydney, 2016).

13 Meyer, W., Cale, P., Koerber, G., Ewenz, C. & Sun, Q. FLUXNET2015 AU-Cpr Calperum. (FluxNet; University of Adelaide, 2016).

14 Beringer, J. & Hutley, L. FLUXNET2015 AU-DaP Daly River Savanna. (FluxNet; Monash Univ., Melbourne, VIC (Australia); Charles Darwin University, 2016).

15 Beringer, J. & Hutley, P. FLUXNET2015 AU-DaS Daly River Cleared. (FluxNet; University of Western Australia; Charles Darwin University; Monash …, 2016).

16 Beringer, J. & Hutley, L. FLUXNET2015 AU-Dry Dry River. (FluxNet; Monash Univ., Melbourne, VIC (Australia); University of Western …, 2016).

17 Schroder, I., Zegelin, S., Palu, T. & Feitz, A. FLUXNET2015 AU-Emr Emerald. (FluxNet; CSIRO; Geoscience Australia, 2016).

18 Macfarlane, C., Lambert, P., Byrne, J., Johnstone, C. & Smart, N. FLUXNET2015 AU-Gin Gingin. (FluxNet; Edith Cowan University (Centre for Ecosystem Management), 2016).

19 Macfarlane, C., Prober, S. & Wiehl, G. FLUXNET2015 AU-GWW Great Western Woodlands, Western Australia, Australia. (FluxNet; CSIRO, 2016).

20 Beringer, J. & Hutley, L. FLUXNET2015 AU-How Howard Springs. (FluxNet; Charles Darwin University; University of Western Australia; Monash …, 2016).

21 Ewenz, C., Stevens, R., Grigson, G. & Connor, S. FLUXNET2015 AU-Lox Loxton. (FluxNet; South Australian Research and Development Institute (SARDI), 2016).

22 Beringer, J. & Hutley, L. FLUXNET2015 AU-RDF Red Dirt Melon Farm, Northern Territory. (FluxNet; Monash Univ., Melbourne, VIC (Australia); Charles Darwin University, 2016).

23 Beringer, J. *et al.* FLUXNET2015 AU-Rig Riggs Creek. (FluxNet; Monash Univ., Melbourne, VIC (Australia), 2016).

24 Liddell, M. J. & Weigand, N. FLUXNET2015 AU-Rob Robson Creek, Queensland, Australia. (FluxNet; James Cook University, 2016).

25 Beringer, J. & Hutley, L. FLUXNET2015 AU-Stp Sturt Plains. (FluxNet; University of Western Australia; Charles Darwin University; Monash …, 2016).

26 Cleverly, J., Eamus, D. & Isaac, P. FLUXNET2015 AU-TTE Ti Tree East. (FluxNet; University of Technology Sydney, 2016).

27 Woodgate, W. *et al.* FLUXNET2015 AU-Tum Tumbarumba. (FluxNet; CSIRO, 2016).

28 Beringer, J., Hutley, L., McGuire, D. & McHugh, I. FLUXNET2015 AU-Wac Wallaby Creek. (FluxNet; Monash Univ., Melbourne, VIC (Australia); University of California …, 2016).

29 Beringer, J. *et al.* FLUXNET2015 AU-Whr Whroo. (FluxNet; Monash Univ., Melbourne, VIC (Australia), 2016).

30 Arndt, S., Hinko-Najera, N., Griebel, A., Beringer, J. & Livesley, S. J. FLUXNET2015 AU-Wom Wombat. (FluxNet; University of Melbourne, School of Ecosystem and Forest Sciences, 2016).

31 Beringer, J. & Walker, J. FLUXNET2015 AU-Ync Jaxa. (FluxNet; University of Western Australia; Monash Univ., Melbourne, VIC …, 2016).

32 De Ligne, A., Manise, T., Moureaux, C., Aubinet, M. & Heinesch, B. FLUXNET2015 BE-Lon Lonzee. (FluxNet; University of Liege-Gembloux Agro-Bio Tech, 2016).

33 De Ligne, A., Manise, T., Heinesch, B., Aubinet, M. & Vincke, C. FLUXNET2015 BE-Vie Vielsalm. (FluxNet; University of Liege-Gembloux Agro-Bio Tech; University catholic of …, 2016).

34 McCaughey, H. FLUXNET2015 CA-Gro Ontario-Groundhog River, Boreal Mixedwood Forest. (FluxNet; Queen's University, 2016).

35 Goulden, M. FLUXNET2015 CA-NS1 UCI-1850 burn site. (FluxNet; University of California-Irvine, 2016).

36 Goulden, M. FLUXNET2015 CA-NS2 UCI-1930 burn site. (FluxNet; University of California-Irvine, 2016).

37 Goulden, M. FLUXNET2015 CA-NS3 UCI-1964 burn site wet. (FluxNet; University of California-Irvine, 2016).

38 Goulden, M. FLUXNET2015 CA-NS4 UCI-1964 burn site wet. (FluxNet; University of California-Irvine, 2016).

39 Goulden, M. FLUXNET2015 CA-NS5 UCI-1981 burn site. (FluxNet; University of California-Irvine, 2016).

40 Goulden, M. FLUXNET2015 CA-NS6 UCI-1989 burn site. (FluxNet; University of California-Irvine, 2016).

41 Goulden, M. FLUXNET2015 CA-NS7 UCI-1998 burn site. (FluxNet; University of California-Irvine, 2016).

42 Black, T. A. FLUXNET2015 CA-Oas Saskatchewan-Western Boreal, Mature Aspen. (FluxNet; The University of British Columbia, 2016).

43 Margolis, H. A. FLUXNET2015 CA-Qfo Quebec-Eastern Boreal, Mature Black Spruce. (FluxNet; Université Laval, 2016).

44 Amiro, B. FLUXNET2015 CA-SF1 Saskatchewan-Western Boreal, forest burned in 1977. (FluxNet; Univ. of Manitoba, Winnipeg, MB (Canada), 2016).

45 Amiro, B. FLUXNET2015 CA-SF2 Saskatchewan-Western Boreal, forest burned in 1989. (FluxNet; Univ. of Manitoba, Winnipeg, MB (Canada), 2016).

46 Amiro, B. FLUXNET2015 CA-SF3 Saskatchewan-Western Boreal, forest burned in 1998. (FluxNet; Univ. of Manitoba, Winnipeg, MB (Canada); Canadian Forest Service, 2016).

47 Arain, M. A. FLUXNET2015 CA-TP1 Ontario-Turkey Point 2002 Plantation White Pine. (FluxNet; McMaster Univ., Hamilton, ON (Canada), 2016).

48 Arain, M. A. FLUXNET2015 CA-TP2 Ontario-Turkey Point 1989 Plantation White Pine. (FluxNet; McMaster Univ., Hamilton, ON (Canada), 2016).

49 Arain, M. A. FLUXNET2015 CA-TPD Ontario-Turkey Point Mature Deciduous. (FluxNet; McMaster Univ., Hamilton, ON (Canada), 2016).

50 Hörtnagl, L. *et al.* FLUXNET2015 CH-Cha Chamau. (FluxNet; ETH Zurich, 2016).

51 Hörtnagl, L. *et al.* FLUXNET2015 CH-Dav Davos. (FluxNet; ETH Zurich, 2016).

52 Hörtnagl, L. *et al.* FLUXNET2015 CH-Fru Früebüel. (FluxNet; ETH Zurich, 2016).

53 Hörtnagl, L. *et al.* FLUXNET2015 CH-Lae Laegern. (FluxNet; ETH Zurich, 2016).

54 Ammann, C. FLUXNET2015 CH-Oe1 Oensingen grassland. (FluxNet; Agroscope Zuerich, 2016).

55 Hörtnagl, L. *et al.* FLUXNET2015 CH-Oe2 Oensingen crop. (FluxNet; ETH Zurich, 2016).

56 Dong, G. FLUXNET2015 CN-Cng Changling. (FluxNet; Shanxi University, 2016).

57 Chen, S. FLUXNET2015 CN-Du2 Duolun_grassland (D01). (FluxNet; Institute of Botany, Chinese Academy of Sciences, 2016).

58 Shao, C. FLUXNET2015 CN-Du3 Duolun Degraded Meadow. (FluxNet, 2016).

59 Sigut, L. *et al.* FLUXNET2015 CZ-BK2 Bily Kriz grassland. (FluxNet; Global Change Research Institute CAS, 2016).

60 Brümmer, C., Lucas-Moffat, A. M., Herbst, M., Kolle, O. & Delorme, J.-P. FLUXNET2015 DE-Geb Gebesee. (FluxNet; Thünen Institute of Climate-Smart Agriculture, Braunschweig, 2016).

61 Bernhofer, C. *et al.* FLUXNET2015 DE-Gri Grillenburg. (FluxNet; TU Dresden, 2016).

62 Knohl, A. *et al.* FLUXNET2015 DE-Hai Hainich. (FluxNet; University of Goettingen, Bioclimatology, 2016).

63 Bernhofer, C. *et al.* FLUXNET2015 DE-Kli Klingenberg. (FluxNet; TU Dresden, 2016).

64 Lindauer, M., Steinbrecher, R., Wolpert, B., Mauder, M. & Schmid, H. P. FLUXNET2015 DE-Lkb Lackenberg. (FluxNet; Karlsruhe Institute of Technology, IMK-IFU, 2016).

65 Knohl, A. *et al.* FLUXNET2015 DE-Lnf Leinefelde. (FluxNet; University of Goettingen, Bioclimatology, 2016).

66 Bernhofer, C. *et al.* FLUXNET2015 DE-Obe Oberbärenburg. (FluxNet; TU Dresden, 2016).

67 Schneider, K. & Schmidt, M. FLUXNET2015 DE-Seh Selhausen. (FluxNet; University of Cologne, 2016).

68 Bernhofer, C. *et al.* FLUXNET2015 DE-Tha Tharandt. (FluxNet; TU Dresden, 2016).

69 Pilegaard, K. & Ibrom, A. FLUXNET2015 DK-Eng Enghave. (FluxNet; Technical University of Denmark (DTU), 2016).

70 Olesen, J. FLUXNET2015 DK-Fou Foulum. (FluxNet; Danish Institute of Agricultural Sciences, 2016).

71 Ibrom, A. & Pilegaard, K. FLUXNET2015 DK-Sor Soroe. (FluxNet; Technical University of Denmark (DTU), 2016).

72 Poveda, F. D. *et al.* FLUXNET2015 ES-Amo Amoladeras. (FluxNet; Estación Experimental de Zona Áridas (EEZA, CSIC), 2016).

73 Reverter, B. R., Perez-Caņete, E. S. & Kowalski, A. S. FLUXNET2015 ES-LgS Laguna Seca. (FluxNet; Universidad de Granada, 2016).

74 Cañete, E. P. S. *et al.* FLUXNET2015 ES-LJu Llano de los Juanes. (FluxNet; University of Granada, 2016).

75 Mammarella, I. *et al.* FLUXNET2015 FI-Hyy Hyytiala. (FluxNet; University of Helsinki, 2016).

76 Buysse, P. *et al.* FLUXNET2015 FR-Gri Grignon. (FluxNet; French National Institute for Agricultural Research, 2016).

77 Berbigier, P., Loustau, D., Bonnefond, J. M., Bosc, A. & Trichet, P. FLUXNET2015 FR-LBr Le Bray. (FluxNet; INRA-UMR ISPA, 2016).

78 Magliulo, V. *et al.* FLUXNET2015 IT-BCi Borgo Cioffi. (FluxNet; CNR ISAFOM, 2016).

79 Sabbatini, S., Arriga, N., Papale, D., Tomassucci, M. & Boschi, A. FLUXNET2015 IT-CA1 Castel d'Asso 1. (FluxNet; University of Tuscia-Vietrbo, 2016).

80 Sabbatini, S. *et al.* FLUXNET2015 IT-CA2 Castel d'Asso 2. (FluxNet; CNR IBIMET; University of Tuscia-Vietrbo, 2016).

81 Sabbatini, S. *et al.* FLUXNET2015 IT-CA3 Castel d'Asso 3. (FluxNet; University of Tuscia-Vietrbo; CNR IBAF, 2016).

82 Matteucci, G. FLUXNET2015 IT-Col Collelongo. (FluxNet; Istituto di Ecologia e Idrologia Forestale CNR, 2016).

83 Valentini, R. *et al.* FLUXNET2015 IT-Cpz Castelporziano. (FluxNet; University of Tuscia-Vietrbo, 2016).

84 Gruening, C., Goded, I., Cescatti, A. & Pokorska, O. FLUXNET2015 IT-Isp Ispra ABC-IS. (FluxNet; European Commission-Joint Research Centre, 2016).

85 Gianelle, D., Zampedri, R., Cavagna, M. & Sottocornola, M. FLUXNET2015 IT-Lav Lavarone. (FluxNet; Edmund Mach Foundation, 2016).

86 Gianelle, D., Cavagna, M., Zampedri, R. & Marcolla, B. FLUXNET2015 IT-MBo Monte Bondone. (FluxNet; Edmund Mach Foundation, 2016).

87 Spano, D. *et al.* FLUXNET2015 IT-Noe Arca di Noe-Le Prigionette. (FluxNet; University of Sassari; CNR-Ibimet Sassari, 2016).

88 Manca, G. & Goded, I. FLUXNET2015 IT-PT1 Parco Ticino forest. (FluxNet; European Commission-DG Joint Research Centre, 2016).

89 Montagnani, L. & Minerbi, S. FLUXNET2015 IT-Ren Renon. (FluxNet; Autonomous Province of Bolzano, Forest Services, 2016).

90 Papale, D. *et al.* FLUXNET2015 IT-Ro2 Roccarespampani 2. (FluxNet; University of Tuscia-Vietrbo, 2016).

91 Cremonese, E., Galvagno, M., di Cella, U. M. & Migliavacca, M. FLUXNET2015 IT-Tor Torgnon. (FluxNet; Environmental Protection Agency of Aosta Valley, 2016).

92 Kotani, A. FLUXNET2015 JP-SMF Seto Mixed Forest Site. (FluxNet; Nagoya University, 2016).

93 Moors, E. & Elbers, J. FLUXNET2015 NL-Loo Loobos. (FluxNet; ALTERRA/Wageningen Environmental Research, 2016).

94 Varlagin, A., Kurbatova, J. & Vygodskaya, N. FLUXNET2015 RU-Fyo Fyodorovskoye. (FluxNet; AN Severtsov Institute of Ecology and Evolution, 2016).

95 Belelli, L., Papale, D. & Valentini, R. FLUXNET2015 RU-Ha1 Hakasia steppe. (FluxNet; University of Tuscia-Vietrbo, 2016).

96 Ardö, J., El Tahir, B. A. & ElKhidir, H. A. M. FLUXNET2015 SD-Dem Demokeya. (FluxNet; LUND UNIVERSITY, 2016).

97 Billesbach, D., Bradford, J. & Torn, M. FLUXNET2015 US-AR1 ARM USDA UNL OSU Woodward Switchgrass 1. (FluxNet; Lawerence Berkeley National Lab; US Dept. of Agriculture (USDA …, 2016).

98 Billesbach, D., Bradford, J. & Torn, M. FLUXNET2015 US-AR2 ARM USDA UNL OSU Woodward Switchgrass 2. (FluxNet; Lawerence Berkeley National Lab; US Dept. of Agriculture (USDA …, 2016).

99 Torn, M. FLUXNET2015 US-ARb ARM Southern Great Plains burn site-Lamont. (FluxNet; Lawrence Berkeley National Lab.(LBNL), Berkeley, CA (United States), 2016).

100 Torn, M. FLUXNET2015 US-ARc ARM Southern Great Plains control site-Lamont. (FluxNet; Lawrence Berkeley National Lab.(LBNL), Berkeley, CA (United States), 2016).

101 Biraud, S., Fischer, M., Chan, S. & Torn, M. FLUXNET2015 US-ARM ARM Southern Great Plains site-Lamont. (FluxNet; Lawrence Berkeley National Lab.(LBNL), Berkeley, CA (United States), 2016).

102 Goldstein, A. FLUXNET2015 US-Blo Blodgett Forest. (FluxNet; Univ. of California, Berkeley, CA (United States), 2016).

103 Chen, J. & Chu, H. FLUXNET2015 US-CRT Curtice Walter-Berger cropland. (FluxNet; University of Toledo/Michigan State University, 2016).

104 Massman, B. FLUXNET2015 US-GLE GLEES. (FluxNet; USDA Forest Service, Savannah River, New Ellenton, SC (United States), 2016).

105 Matamala, R. FLUXNET2015 US-IB2 Fermi National Accelerator Laboratory-Batavia (Prairie site). (FluxNet; Argonne National Lab.(ANL), Argonne, IL (United States), 2016).

106 Drake, B. & Hinkle, R. FLUXNET2015 US-KS1 Kennedy Space Center (slash pine). (FluxNet; Smithsonian Environmental Research Center; Univ. of Central Florida …, 2016).

107 Drake, B. & Hinkle, R. FLUXNET2015 US-KS2 Kennedy Space Center (scrub oak) FLUXNET. *Smithsonian Environmental Research Center* (2016).

108 Fares, S. FLUXNET2015 US-Lin Lindcove Orange Orchard. (FluxNet; Entecra, 2016).

109 Law, B. FLUXNET2015 US-Me1 Metolius-Eyerly burn. (FluxNet; Oregon State Univ., Corvallis, OR (United States), 2016).

110 Law, B. FLUXNET2015 US-Me2 Metolius mature ponderosa pine. (FluxNet; Oregon State Univ., Corvallis, OR (United States), 2016).

111 Law, B. FLUXNET2015 US-Me3 Metolius-second young aged pine. (FluxNet; Oregon State Univ., Corvallis, OR (United States), 2016).

112 Law, B. FLUXNET2015 US-Me5 Metolius-first young aged pine. (FluxNet; Oregon State Univ., Corvallis, OR (United States), 2016).

113 Novick, K. & Phillips, R. FLUXNET2015 US-MMS Morgan Monroe State Forest. (FluxNet; Indiana Univ., Bloomington, IN (United States), 2016).

114 Blanken, P. D., Monson, R. K., Burns, S. P., Bowling, D. R. & Turnipseed, A. A. FLUXNET2015 US-NR1 Niwot Ridge Forest (LTER NWT1). (FluxNet; University of Colorado, 2016).

115 Chen, J., Chu, H. & Noormets, A. FLUXNET2015 US-Oho Oak Openings. (FluxNet; University of Toledo/Michigan State University, 2016).

116 Desai, A. FLUXNET2015 US-PFa Park Falls/WLEF. (FluxNet; Univ. of Wisconsin, Madison, WI (United States), 2016).

117 Kurc, S. FLUXNET2015 US-SRC Santa Rita Creosote. (FluxNet; Univ. of Arizona, Tucson, AZ (United States), 2016).

118 Scott, R. FLUXNET2015 US-SRG Santa Rita Grassland. (FluxNet; US Dept. of Agriculture (USDA), Washington, DC (United States), 2016).

119 Scott, R. FLUXNET2015 US-SRM Santa Rita Mesquite. (FluxNet; US Dept. of Agriculture (USDA), Washington, DC (United States), 2016).

120 Ewers, B. & Pendall, E. FLUXNET2015 US-Sta Saratoga. (FluxNet; Univ. of Wyoming, Laramie, WY (United States), 2016).

121 Desai, A. FLUXNET2015 US-Syv Sylvania Wilderness Area. (FluxNet; Univ. of Wisconsin, Madison, WI (United States), 2016).

122 Baldocchi, D. & Ma, S. FLUXNET2015 US-Ton Tonzi Ranch. (FluxNet; Univ. of California, Berkeley, CA (United States), 2016).

123 Sturtevant, C., Verfaillie, J. & Baldocchi, D. FLUXNET2015 US-Tw2 Twitchell Corn. (FluxNet; Univ. of California, Berkeley, CA (United States), 2016).

124 Szutu, D. & Baldocchi, D. FLUXNET2015 US-Tw3 Twitchell Alfalfa. (FluxNet; Univ. of California, Berkeley, CA (United States), 2016).

125 Baldocchi, D., Ma, S. & Xu, L. FLUXNET2015 US-Var Vaira Ranch-Ione. (FluxNet; Univ. of California, Berkeley, CA (United States), 2016).

126 Desai, A. FLUXNET2015 US-WCr Willow Creek. (FluxNet; Univ. of Wisconsin, Madison, WI (United States), 2016).

127 Scott, R. FLUXNET2015 US-Whs Walnut Gulch Lucky Hills Shrub. (FluxNet; US Dept. of Agriculture (USDA), Washington, DC (United States), 2016).

128 Scott, R. FLUXNET2015 US-Wkg Walnut Gulch Kendall Grasslands. (FluxNet; US Dept. of Agriculture (USDA), Washington, DC (United States), 2016).

129 Kutsch, W. L., Merbold, L. & Kolle, O. FLUXNET2015 ZM-Mon Mongu. (FluxNet; Max-Planck Institute for Biogeochemistry, 2016).
